# Supplementary material for: The Performance of the Construction of a Water Ecological Civilization City: International Assessment and Comparison
Source: MDPI journal article supplement (doi:10.3390/su15043071), 2023-02-08
Supplement: s1 [file s1]

**Table S1. The results of keyword analysis for Second-level indicators for Wuhan documents analyzed**

| Second level indicators       | W1    | W2    | W3    | Wuhan mean |
|-------------------------------|-------|-------|-------|------------|
| Water supply and utilisation  | 27.7% | 11.5% | 3.95% | 14.4%      |
| Water recycle                 | 4.30% | 3.84% | 1.51% | 3.22%      |
| Water Resource Endowment      | 34.4% | 31.1% | 16.4% | 27.3%      |
| Water source safety           | 9.75% | 6.21% | 6.29% | 7.42%      |
| Flood Resilience and Drainage | 3.67% | 4.66% | 18.6% | 8.98%      |
| Water regulation guarantee    | 6.60% | 8.90% | 24.2% | 13.2%      |
| Water ecological status       | 4.02% | 10.3% | 17.8% | 10.7%      |
| Water ecological restoration  | 5.08% | 11.8% | 5.05% | 7.31%      |
| Cultural heritage             | 2.30% | 9.36% | 3.63% | 5.10%      |
| Public awareness              | 2.14% | 2.17% | 2.39% | 2.23%      |

**Table S2. The results of First-level indicators for Wuhan**

|            | Water resources management | Water safety guarantee | Water ecological health | Water culture system |
|------------|----------------------------|------------------------|-------------------------|----------------------|
| W1         | 66.4%                      | 20.0%                  | 9.11%                   | 4.4%                 |
| W2         | 46.5%                      | 19.7%                  | 22.1%                   | 11.5%                |
| W3         | 21.9%                      | 49.1%                  | 22.9%                   | 6.03%                |
| Wuhan mean | 44.9%                      | 29.6%                  | 18.0%                   | 7.33%                |

**Table S3. The results of Second-level indicators for Cleveland**

| Second-level indicators       | C1    | C2     | C3    | Cleveland mean |
|-------------------------------|-------|--------|-------|----------------|
| Water supply and utilisation  | 5.38% | 39.4%  | 8.28% | 17.6%          |
| Water recycle                 | 3.46% | 0.650% | 3.41% | 2.51%          |
| Water Resource Endowment      | 17.7% | 10.0%  | 11.9% | 13.2%          |
| Water source safety           | 15.1% | 4.20%  | 19.4% | 12.9%          |
| Flood Resilience and Drainage | 9.75% | 1.13%  | 5.85% | 5.58%          |
| Water regulation guarantee    | 20.3% | 24.0%  | 31.9% | 25.4%          |
| Water ecological status       | 17.6% | 0.00%  | 1.75% | 6.47%          |
| Water ecological restoration  | 7.08% | 15.3%  | 12.5% | 11.6%          |
| Cultural heritage             | 2.22% | 0.00%  | 1.07% | 1.10%          |
| Public awareness              | 1.19% | 5.17%  | 3.61% | 3.32%          |

**Table S4. The results of First-level indicators for Cleveland**

|    | Water resources management | Water safety guarantee | Water ecological health | Water culture system |
|----|----------------------------|------------------------|-------------------------|----------------------|
| C1 | 26.5%                      | 45.3%                  | 24.7%                   | 3.40%                |
| C2 | 50.0%                      | 29.4%                  | 15.3%                   | 5.17%                |

|                       |       |       |       |       |
|-----------------------|-------|-------|-------|-------|
| <b>C3</b>             | 23.6% | 57.3% | 14.3% | 4.68% |
| <b>Cleveland mean</b> | 33.4% | 44.0% | 18.1% | 4.42% |

**Table S5. The results of Second-level indicators for Sydney**

| <b>Second-level indicators</b> | <b>S1</b> | <b>S2</b> | <b>S3</b> | <b>Sydney mean</b> |
|--------------------------------|-----------|-----------|-----------|--------------------|
| Water supply and utilisation   | 14.7%     | 8.43%     | 32.5%     | 18.5%              |
| Water recycle                  | 16.0%     | 8.92%     | 7.79%     | 10.9%              |
| Water Resource Endowment       | 10.5%     | 3.27%     | 7.35%     | 7.05%              |
| Water source safety            | 8.52%     | 2.24%     | 5.27%     | 5.34%              |
| Flood Resilience and Drainage  | 15.2%     | 6.82%     | 4.40%     | 8.81%              |
| Water regulation guarantee     | 5.83%     | 59.8%     | 26.4%     | 30.6%              |
| Water ecological status        | 19.1%     | 1.36%     | 1.26%     | 7.26%              |
| Water ecological restoration   | 4.74%     | 4.45%     | 10.7%     | 6.64%              |
| Cultural heritage              | 4.13%     | 3.52%     | 2.71%     | 3.45%              |
| Public awareness               | 1.09%     | 1.20%     | 1.55%     | 1.28%              |

**Table S6. The results of First-level indicators for Sydney**

|                    | <b>Water resources management</b> | <b>Water safety guarantee</b> | <b>Water ecological health</b> | <b>Water culture system</b> |
|--------------------|-----------------------------------|-------------------------------|--------------------------------|-----------------------------|
| <b>S1</b>          | 41.3%                             | 29.5%                         | 23.9%                          | 5.22%                       |
| <b>S2</b>          | 20.6%                             | 68.8%                         | 5.81%                          | 4.72%                       |
| <b>S3</b>          | 47.6%                             | 36.0%                         | 11.9%                          | 4.26%                       |
| <b>Sydney mean</b> | 36.5%                             | 44.8%                         | 13.9%                          | 4.73%                       |

**S1. Explanation of each evaluation index**

| <b>Evaluation index</b>                     | <b>Explanation</b>                                                                                                                                                                                                                             |
|---------------------------------------------|------------------------------------------------------------------------------------------------------------------------------------------------------------------------------------------------------------------------------------------------|
| Average monthly precipitation in wet season | Monthly average rainfall for the six consecutive months with most rainfall                                                                                                                                                                     |
| Average monthly precipitation in dry season | Monthly average rainfall for the six consecutive months with least rainfall                                                                                                                                                                    |
| Water environment-related civic features    | Civic features that have water environmental functions (e.g. water-culture museums and theatres, parks with water features, parks with water play areas)                                                                                       |
| Water resources per capita                  | Total water resources per capita (including groundwater and surface water)                                                                                                                                                                     |
| Forest cover rate                           | The proportion of forest area in the city boundary to the total urban land area                                                                                                                                                                |
| Wetland area cover rate                     | The proportion of wetlands in the city boundary to the total urban land area.<br>Natural wetlands include marshes, peatlands, lakes, rivers, beaches, and salt marshes. Artificial wetlands mainly include rice fields, reservoirs, and ponds. |

|                                                            |                                                                                                                                                                                                                                                                                                                                                                                                                                                                                                                                                       |
|------------------------------------------------------------|-------------------------------------------------------------------------------------------------------------------------------------------------------------------------------------------------------------------------------------------------------------------------------------------------------------------------------------------------------------------------------------------------------------------------------------------------------------------------------------------------------------------------------------------------------|
| Water function area water quality compliance rate          | <p>Water function area: refers to the area designated by the government in order to protect the use function of the water body. The water quality in the area must meet the corresponding classification standards.</p> <p>Compliance rate: each functional area category has corresponding water quality index. If each index does not exceed the water quality standard value of this category, it is said to meet the standard.</p> <p>Water function area water quality compliance rate: the proportion of water bodies meeting the standard.</p> |
| Drinking water quality compliance rate                     | The proportion of the drinking water supplied to the urban area that meets drinking water standards                                                                                                                                                                                                                                                                                                                                                                                                                                                   |
| The population density                                     | Number of people per unit urban land area                                                                                                                                                                                                                                                                                                                                                                                                                                                                                                             |
| GDP per capita                                             | The GDP achieved in a urban accounting period (usually one year) per resident in the urban area                                                                                                                                                                                                                                                                                                                                                                                                                                                       |
| Secondary industry output value as a percentage of GDP     | <p>Proportion of output value of secondary industry in GDP.</p> <p>Secondary industries include manufacturing, extractive industries, construction and public works, hydropower, oil and gas, pharmaceutical manufacturing</p>                                                                                                                                                                                                                                                                                                                        |
| Tertiary industry output value as a percentage of GDP      | <p>Proportion of output value of Tertiary industry in GDP</p> <p>The tertiary industry includes commerce, finance, transportation, communication, education, service and other non-material production sectors</p>                                                                                                                                                                                                                                                                                                                                    |
| Water consumption per year                                 | Average daily water consumption per capita.                                                                                                                                                                                                                                                                                                                                                                                                                                                                                                           |
| Average water consumption per ha of farmland irrigation    | Average irrigation water consumption per ha of farmland in the city boundary                                                                                                                                                                                                                                                                                                                                                                                                                                                                          |
| Water consumption per GBP 10,000 of industrial added value | The water resources consumed to obtain the output industrial value of 10,000 GBP                                                                                                                                                                                                                                                                                                                                                                                                                                                                      |
| Proportion of groundwater in water supply                  | Dependence of drinking water on groundwater                                                                                                                                                                                                                                                                                                                                                                                                                                                                                                           |
| Sewage treatment compliance rate                           | The proportion of treated domestic sewage and industrial wastewater up to the standard in the total amount of treated water                                                                                                                                                                                                                                                                                                                                                                                                                           |
| Recycling rate of water used by industry                   | Proportion of water used by industry in the city that it recycled                                                                                                                                                                                                                                                                                                                                                                                                                                                                                     |

## S2. Sources of Data for the index values for the 15 study cities

| Indicator | Chengdu, Wuhan, Xiangyang, Zhuzhou and Suining; CN                                                   |
|-----------|------------------------------------------------------------------------------------------------------|
| A1        | China Meteorological Data Service Centre. 'Monthly data set of China's terrestrial cumulative years' |
| A2        | China Meteorological Data Service Centre. 'Monthly data set of China's terrestrial cumulative years' |

|                  |                                                                                                                                                                                             |
|------------------|---------------------------------------------------------------------------------------------------------------------------------------------------------------------------------------------|
| A3               | Chengdu, Wuhan, Xiangyang, Zhuzhou and Suining City Garden and Forestry Bureau. '2019 Annual Report on Government Information Disclosure of City Garden and Forestry Bureau'                |
| A4               | Municipal water authority (Chengdu, Wuhan, Xiangyang, Zhuzhou and Suining). '2018 (Chengdu, Wuhan, Xiangyang, Zhuzhou and Suining) Water Resources Bulletin'                                |
| B1               | China statistics press. '2018 (Chengdu, Wuhan, Xiangyang, Zhuzhou and Suining) Statistical Yearbook'                                                                                        |
| B2               | China statistics press. '2018 (Chengdu, Wuhan, Xiangyang, Zhuzhou and Suining) Statistical Yearbook'                                                                                        |
| B3               | Changjiang River Scientific Research Institute. '2019 (Chengdu, Wuhan, Xiangyang, Zhuzhou and Suining) Water Ecological Civilization City Construction Pilot Technology Evaluation Report'  |
| B4               | Changjiang River Scientific Research Institute. '2019 (Chengdu, Wuhan, Xiangyang, Zhuzhou and Suining) Water Ecological Civilization City Construction Pilot Technology Evaluation Report'  |
| C1               | China statistics press. '2019 (Chengdu, Wuhan, Xiangyang, Zhuzhou and Suining) Statistical Yearbook'                                                                                        |
| C2               | China statistics press. '2019 (Chengdu, Wuhan, Xiangyang, Zhuzhou and Suining) Statistical Yearbook'                                                                                        |
| C3               | China statistics press. '2019 (Chengdu, Wuhan, Xiangyang, Zhuzhou and Suining) Statistical Yearbook'                                                                                        |
| C4               | China statistics press. '2019 (Chengdu, Wuhan, Xiangyang, Zhuzhou and Suining) Statistical Yearbook'                                                                                        |
| D1               | Municipal water authority (Chengdu, Wuhan, Xiangyang, Zhuzhou and Suining). '2018 (Chengdu, Wuhan, Xiangyang, Zhuzhou and Suining) Water Resources Bulletin'                                |
| D2               | Municipal water authority (Chengdu, Wuhan, Xiangyang, Zhuzhou and Suining). '2018 (Chengdu, Wuhan, Xiangyang, Zhuzhou and Suining) Water Resources Bulletin'                                |
| D3               | Chengjiang River Scientific Research Institute. '2019 (Chengdu, Wuhan, Xiangyang, Zhuzhou and Suining) Water Ecological Civilization City Construction Pilot Technology Evaluation Report'  |
| D4               | Changjiang River Scientific Research Institute. '2019 (Chengdu, Wuhan, Xiangyang, Zhuzhou and Suining) Water Ecological Civilization City Construction Pilot Technology Evaluation Report'  |
| D5               | Changjiang River Scientific Research Institute. '2019 (Chengdu, Wuhan, Xiangyang, Zhuzhou and Suining) Water Ecological Civilization City Construction Pilot Technology Evaluation Report'  |
| D6               | Municipal water authority (Chengdu, Wuhan, Xiangyang, Zhuzhou and Suining). '2018 (Chengdu, Wuhan, Xiangyang, Zhuzhou and Suining) Water Resources Bulletin'                                |
| <b>Indicator</b> | <b>Cleveland, USA</b>                                                                                                                                                                       |
| A1               | U.S. climate Data:<br><a href="https://www.usclimatedata.com/climate/cleveland/ohio/united-states/usoh1176">https://www.usclimatedata.com/climate/cleveland/ohio/united-states/usoh1176</a> |
| A2               | U.S. climate Data:<br><a href="https://www.usclimatedata.com/climate/cleveland/ohio/united-states/usoh1176">https://www.usclimatedata.com/climate/cleveland/ohio/united-states/usoh1176</a> |
| A3               | US Water Alliance. 'AN EQUITABLE WATER FUTURE Cleveland'                                                                                                                                    |

|    |                                                                                                                                                                                 |
|----|---------------------------------------------------------------------------------------------------------------------------------------------------------------------------------|
| A4 | CITY OF CLEVELAND, DIVISION OF WATER. 'Cleveland water 2018 water quality report'                                                                                               |
| B1 | The Cleveland Tree Plan 2017                                                                                                                                                    |
| B2 | The Cleveland Tree Plan 2017                                                                                                                                                    |
| B3 | CITY OF CLEVELAND, DIVISION OF WATER. 'Cleveland water 2018 water quality report'                                                                                               |
| B4 | CITY OF CLEVELAND, DIVISION OF WATER. 'Cleveland water 2018 water quality report'                                                                                               |
| C1 | World population available at <a href="https://worldpopulationreview.com/us-cities/cleveland-population/">https://worldpopulationreview.com/us-cities/cleveland-population/</a> |
| C2 | U.S. Bureau of Labor statistics. 'Economic report of Cleveland 2018'                                                                                                            |
| C3 | Federal Reserve Bank of Cleveland. 2020. 'Cleveland—Improved Economic Conditions'                                                                                               |
| C4 | Federal Reserve Bank of Cleveland. 2020. 'Cleveland—Improved Economic Conditions'                                                                                               |
| D1 | CITY OF CLEVELAND, DIVISION OF WATER. 'Cleveland water 2018 water quality report'                                                                                               |
| D2 | United States Geological Survey water resources. 'USGS Water Use Data for Ohio in 2018'                                                                                         |
| D3 | United States Geological Survey water resources. 'USGS Water Use Data for Ohio in 2018'                                                                                         |
| D4 | City of Cleveland, Division of Drinking and Ground Waters. 2018. 'Ground Water in Ohio'                                                                                         |
| D5 | US Water Alliance. 'AN EQUITABLE WATER FUTURE Cleveland'                                                                                                                        |
| D6 | Ohio Environmental Protection Agency. 'Ohio 2018 Integrated Water Quality Monitoring and Assessment Report'                                                                     |

| Indicator | Minneapolis, USA                                                                                                                                                                                                                                                                                                                                                                                                           |
|-----------|----------------------------------------------------------------------------------------------------------------------------------------------------------------------------------------------------------------------------------------------------------------------------------------------------------------------------------------------------------------------------------------------------------------------------|
| A1        | U.S. climate Data Available at:<br><a href="https://www.usclimatedata.com/climate/minneapolis/minnesota/united-states/usmn0503">https://www.usclimatedata.com/climate/minneapolis/minnesota/united-states/usmn0503</a>                                                                                                                                                                                                     |
| A2        | U.S. climate Data Available at:<br><a href="https://www.usclimatedata.com/climate/minneapolis/minnesota/united-states/usmn0503">https://www.usclimatedata.com/climate/minneapolis/minnesota/united-states/usmn0503</a>                                                                                                                                                                                                     |
| A3        | Meet Minneapolis. 2020. Amusement & Waterparks - Meet Minneapolis. [online] Available at:<br>< <a href="https://www.minneapolis.org/things-to-do/amusement-and-waterparks/">https://www.minneapolis.org/things-to-do/amusement-and-waterparks/</a> > [Accessed 24 June 2020].<br><a href="https://www.minneapolis.org/parks__destinations/parks__lakes/">https://www.minneapolis.org/parks__destinations/parks__lakes/</a> |
| A4        | Minneapolis Public works. 'About Minnesota water' [online] Available at:<br>< <a href="http://minneapolismn.gov/publicworks/water/water_waterfacts">http://minneapolismn.gov/publicworks/water/water_waterfacts</a> >                                                                                                                                                                                                      |

|     |                                                                                                                                                                                                                                                                             |
|-----|-----------------------------------------------------------------------------------------------------------------------------------------------------------------------------------------------------------------------------------------------------------------------------|
| A5  | United States Department of Agriculture. 'Forests of Minnesota, 2018'                                                                                                                                                                                                       |
| A6  | United States Department of Agriculture. 'Forests of Minnesota, 2018'                                                                                                                                                                                                       |
| A7  | Minneapolis Public works. '2018 Water Quality Report'                                                                                                                                                                                                                       |
| A8  | Minneapolis Public works. '2018 Water Quality Report'                                                                                                                                                                                                                       |
| A9  | World population Available at <a href="https://worldpopulationreview.com/us-cities/minneapolis-population/">https://worldpopulationreview.com/us-cities/minneapolis-population/</a>                                                                                         |
| A10 | U.S. Bureau of Labor statistics. 'Economic report of Minneapolis 2018'                                                                                                                                                                                                      |
| A11 | Colliers International   Minneapolis-St. Paul. '2018Minneapolis St Paul Overview'                                                                                                                                                                                           |
| A12 | Colliers International   Minneapolis-St. Paul. '2018Minneapolis St Paul Overview'                                                                                                                                                                                           |
| A13 | Minnesota Department of Natural resources. 'Minnesota Water Use Data 1988-2018'                                                                                                                                                                                             |
| A14 | United States Geological Survey water resources. 'USGS Water Use Data for Minnesota in 2018'                                                                                                                                                                                |
| A15 | United States Geological Survey water resources. 'USGS Water Use Data for Minnesota in 2018'                                                                                                                                                                                |
| A16 | Minnesota Department of Natural Resources. 2020. <i>Groundwater</i> . [online] Available at: < <a href="https://www.dnr.state.mn.us/waters/groundwater_section/index.html">https://www.dnr.state.mn.us/waters/groundwater_section/index.html</a> > [Accessed 24 June 2020]. |
| A17 | Minnesota Department of Natural resources. 'MINNESOTA WATER CONSERVATION REPORT 2018'                                                                                                                                                                                       |
| A18 | Minnesota Water Resources Centre. 'Advancing Safe and Sustainable Water Reuse in Minnesota 2018 REPORT OF THE INTERAGENCY WORKGROUP ON WATER REUSE'                                                                                                                         |

| Indicator | St. Paul, USA                                                                                                                                                                                                        |
|-----------|----------------------------------------------------------------------------------------------------------------------------------------------------------------------------------------------------------------------|
| A1        | U.S. climate Data Available at:<br><a href="https://www.usclimatedata.com/climate/saint-paul/minnesota/united-states/usmn1299">https://www.usclimatedata.com/climate/saint-paul/minnesota/united-states/usmn1299</a> |
| A2        | U.S. climate Data Available at:<br><a href="https://www.usclimatedata.com/climate/saint-paul/minnesota/united-states/usmn1299">https://www.usclimatedata.com/climate/saint-paul/minnesota/united-states/usmn1299</a> |
| A3        | <a href="https://www.stpaul.gov/departments/parks-recreation/aquatics">https://www.stpaul.gov/departments/parks-recreation/aquatics</a>                                                                              |
| A4        | CITY OF SAINT PAUL COMPREHENSIVE PLAN. 'Water Resources Management '                                                                                                                                                 |
| B1        | United States Department of Agriculture. 'Forests of Minnesota, 2018'                                                                                                                                                |
| B2        | Saint Paul Department of Parks and Recreation-Forestry Unit. 'Saint Paul, Minnesota Urban Canopy Assessment 2021'                                                                                                    |
| B3        | Saint Paul Regional Water Services. 'Water Quality Report 2018'                                                                                                                                                      |
| B4        | Saint Paul Regional Water Services. 'Water Quality Report 2018'                                                                                                                                                      |
| C1        | World population Available at <a href="https://worldpopulationreview.com/us-cities/st-paul-population/">https://worldpopulationreview.com/us-cities/st-paul-population/</a>                                          |
| C2        | Minnesota Department of Employment and Economic Development. 'Compare Minnesota: See how Minnesota compares to other states'                                                                                         |

|    |                                                                                                                                                                                                                                                                             |
|----|-----------------------------------------------------------------------------------------------------------------------------------------------------------------------------------------------------------------------------------------------------------------------------|
| C3 | Colliers International   Minneapolis-St. Paul. '2018 Minneapolis St Paul Overview'                                                                                                                                                                                          |
| C4 | Colliers International   Minneapolis-St. Paul. '2018 Minneapolis St Paul Overview'                                                                                                                                                                                          |
| D1 | Minnesota Department of Natural resources. 'Minnesota Water Use Data 1988-2018'                                                                                                                                                                                             |
| D2 | United States Geological Survey water resources. 'USGS Water Use Data for Minnesota in 2018'                                                                                                                                                                                |
| D3 | United States Geological Survey water resources. 'USGS Water Use Data for Minnesota in 2018'                                                                                                                                                                                |
| D4 | Minnesota Department of Natural Resources. 2020. <i>Groundwater</i> . [online] Available at: < <a href="https://www.dnr.state.mn.us/waters/groundwater_section/index.html">https://www.dnr.state.mn.us/waters/groundwater_section/index.html</a> > [Accessed 24 June 2020]. |
| D5 | Minnesota Department of Natural resources. 'MINNESOTA WATER CONSERVATION REPORT 2018'                                                                                                                                                                                       |
| D6 | Minnesota Water Resources Centre. 'Advancing Safe and Sustainable Water Reuse in Minnesota 2018 REPORT OF THE INTERAGENCY WORKGROUP ON WATER REUSE'                                                                                                                         |

| Indicator | Toronto, Canada                                                                                                                                                                                                                                                             |
|-----------|-----------------------------------------------------------------------------------------------------------------------------------------------------------------------------------------------------------------------------------------------------------------------------|
| A1        | toronto.weatherstats.ca Available at:<br><a href="https://toronto.weatherstats.ca/charts/precipitation-monthly.html">https://toronto.weatherstats.ca/charts/precipitation-monthly.html</a>                                                                                  |
| A2        | toronto.weatherstats.ca Available at:<br><a href="https://toronto.weatherstats.ca/charts/precipitation-monthly.html">https://toronto.weatherstats.ca/charts/precipitation-monthly.html</a>                                                                                  |
| A3        | Counted by google information+ <a href="https://trca.ca/conservation/restoration/wetlands/">https://trca.ca/conservation/restoration/wetlands/</a><br><a href="https://en.wikipedia.org/wiki/List_of_Toronto_parks">https://en.wikipedia.org/wiki/List_of_Toronto_parks</a> |
| A4        | Toronto.ca. '2019 Drinking Water System Summary Report Final_AODA'                                                                                                                                                                                                          |
| B1        | Toronto.ca. 'SUSTAINING AND EXPANDING THE URBAN FOREST: TORONTO'S STRATEGIC FOREST MANAGEMENT PLAN 2012-2022'                                                                                                                                                               |
| B2        | Environmental Commissioner of Ontario. '2018 Environmental Protection Report, Chapter 1-Protecting Southern Ontario's Wetlands'                                                                                                                                             |
| B3        | Toronto and Region Conservation Authority. 'Regional Watershed Monitoring Program: Surface Water Quality Summary, 2018'                                                                                                                                                     |
| B4        | Toronto.ca. 'Drinking Water Analysis SUMMARY 2018'                                                                                                                                                                                                                          |
| C1        | Canada Population 2018. 'Population of Toronto 2018' Available at:< <a href="https://canadapopulation2018.com/population-of-toronto-2018">https://canadapopulation2018.com/population-of-toronto-2018</a> >                                                                 |
| C2        | Toronto.ca. '2018 Issue Briefing: Toronto's Economy'                                                                                                                                                                                                                        |

|    |                                                                                                                                                                                                                                        |
|----|----------------------------------------------------------------------------------------------------------------------------------------------------------------------------------------------------------------------------------------|
| C3 | Toronto.ca. 'Toronto's Economy, Labour Force & Demographics-Gross Domestic Product (GDP) for City'                                                                                                                                     |
| C4 | Toronto.ca. 'Toronto's Economy, Labour Force & Demographics-Gross Domestic Product (GDP) for City'                                                                                                                                     |
| D1 | Toronto.ca. 'City of Toronto average water consumption'                                                                                                                                                                                |
| D2 | Toronto.ca. 'Water Consumption Report 2018'                                                                                                                                                                                            |
| D3 | Toronto.ca. '2018 Water and Wastewater Consumption Rates and Service Fees'                                                                                                                                                             |
| D4 | Toronto and Region Conservation Authority. 'Environmental Monitoring and Data Management: Program Highlights 2018'                                                                                                                     |
| D5 | Toronto.ca. 'Sewers and Water Supply By-laws 2017 Compliance and Enforcement Annual Report<br>NORTH TORONTO TREATMENT PLANT 2019 Annual Report'                                                                                        |
| D6 | Toronto.ca. 'ASHBRIDGES BAY WASTEWATER TREATMENT PLANT 2019 Annual Report'<br>'HIGHLAND CREEK TREATMENT PLANT 2019 Annual Report'<br>'HUMBER TREATMENT PLANT 2019 Annual Report'<br>'NORTH TORONTO TREATMENT PLANT 2019 Annual Report' |

| Indicator | Copenhagen, Denmark                                                                                                                                                                                                          |
|-----------|------------------------------------------------------------------------------------------------------------------------------------------------------------------------------------------------------------------------------|
| A1        | European climate-data Available at:<br><a href="https://en.climate-data.org/europe/denmark/capital-region-of-denmark/copenhagen-23/">https://en.climate-data.org/europe/denmark/capital-region-of-denmark/copenhagen-23/</a> |
| A2        | European climate-data Available at:<br><a href="https://en.climate-data.org/europe/denmark/capital-region-of-denmark/copenhagen-23/">https://en.climate-data.org/europe/denmark/capital-region-of-denmark/copenhagen-23/</a> |
| A3        | <a href="https://en.wikipedia.org/wiki/List_of_parks_and_open_spaces_in_Copenhagen">https://en.wikipedia.org/wiki/List_of_parks_and_open_spaces_in_Copenhagen</a>                                                            |
| A4        | Danish Ministry of the environment. 'Water supply in Denmark'                                                                                                                                                                |
| B1        | AARHUS UNIVERSITY. 2014. 'ESTIMATING LAND USE/LAND COVER CHANGES IN DENMARK FROM 1990 – 2012'                                                                                                                                |
| B2        | AARHUS UNIVERSITY. 2014. 'ESTIMATING LAND USE/LAND COVER CHANGES IN DENMARK FROM 1990 – 2012'                                                                                                                                |
| B3        | European Environment Agency. 2018. 'Surface water quality monitoring - summary: Denmark'                                                                                                                                     |
| B4        | Can you drink tap water in Copenhagen? 'Can you drink tap water in Copenhagen?'<br><a href="https://www.canyoudrinktapwaterin.com/copenhagen-tap-water/">https://www.canyoudrinktapwaterin.com/copenhagen-tap-water/</a>     |
| C1        | The london school of economics and political science. 2020. 'Copenhagen-Green Economy Leader Report'                                                                                                                         |
| C2        | The london school of economics and political science. 2020. 'Copenhagen-Green Economy Leader Report'                                                                                                                         |
| C3        | The london school of economics and political science. 2020. 'Copenhagen-Green Economy Leader Report'                                                                                                                         |



|    |                                                                                                                                                                                                                                                                                    |
|----|------------------------------------------------------------------------------------------------------------------------------------------------------------------------------------------------------------------------------------------------------------------------------------|
| C4 | The london school of economics and political science. 2020. 'Copenhagen-Green Economy Leader Report'                                                                                                                                                                               |
| D1 | Danva. 'Water-in-figures_2018'                                                                                                                                                                                                                                                     |
| D2 | Danish Agriculture & Food Council. 2019. 'Facts and Figures Denmark-a food and farming Country '                                                                                                                                                                                   |
| D3 | Morten Bidstrup Yana Konstantinova Ramsheva. 2012. 'The Virtual Water Consumption of Denmark- an Application of the Water Footprint Methodology'                                                                                                                                   |
| D4 | Danish Ministry of the environment. 'Water supply in Denmark'                                                                                                                                                                                                                      |
| D5 | Danva. 'Water-in-figures_2018'                                                                                                                                                                                                                                                     |
| D6 | Statistics Denmark. 'Water and waste water'<br><a href="https://www.dst.dk/en/Statistik/emner/geografi-miljoe-og-energi/groent-nationalregnskab/vand-og-spildevand">https://www.dst.dk/en/Statistik/emner/geografi-miljoe-og-energi/groent-nationalregnskab/vand-og-spildevand</a> |

| Indicator | London, UK                                                                                                                                                                                                                                                                                                       |
|-----------|------------------------------------------------------------------------------------------------------------------------------------------------------------------------------------------------------------------------------------------------------------------------------------------------------------------|
| A1        | Metoffice.gov.uk. UK climate averages Available at:<br><a href="https://www.metoffice.gov.uk/research/climate/maps-and-data/uk-climate-averages/u10hb54gm">https://www.metoffice.gov.uk/research/climate/maps-and-data/uk-climate-averages/u10hb54gm</a>                                                         |
| A2        | Metoffice.gov.uk. UK climate averages Available at:<br><a href="https://www.metoffice.gov.uk/research/climate/maps-and-data/uk-climate-averages/u10hb54gm">https://www.metoffice.gov.uk/research/climate/maps-and-data/uk-climate-averages/u10hb54gm</a>                                                         |
| A3        | <a href="https://en.wikipedia.org/wiki/Parks_and_open_spaces_in_London">https://en.wikipedia.org/wiki/Parks_and_open_spaces_in_London</a>                                                                                                                                                                        |
| A4        | Thames Water. 'Final Water Resources Management Plan 2015 - 2040 Main Report'                                                                                                                                                                                                                                    |
| B1        | MAYOR OF LONDON. 'Trees and woodlands' Available at:<br><a href="https://www.london.gov.uk/what-we-do/environment/parks-green-spaces-and-biodiversity/trees-and-woodlands">https://www.london.gov.uk/what-we-do/environment/parks-green-spaces-and-biodiversity/trees-and-woodlands</a>                          |
| B2        | London.gov.uk. 'VALUING LONDON'S URBAN FOREST Results of the London i-Tree Eco Project'                                                                                                                                                                                                                          |
| B3        | MAYOR OF LONDON. 'Water quality' Available at:<br><a href="https://www.london.gov.uk/what-we-do/environment/climate-change/climate-adaptation/water-quality">https://www.london.gov.uk/what-we-do/environment/climate-change/climate-adaptation/water-quality</a>                                                |
| B4        | TripSavvy. 'Is Tap Water Safe to Drink in London and the UK?'<br><a href="https://www.tripsavvy.com/is-london-tap-water-safe-1583358">https://www.tripsavvy.com/is-london-tap-water-safe-1583358</a>                                                                                                             |
| C1        | Mayor of London London datastore. 'Land Area and Population Density, Ward and Borough Greater London Authority (GLA)'<br><a href="https://data.london.gov.uk/dataset/land-area-and-population-density-ward-and-borough">https://data.london.gov.uk/dataset/land-area-and-population-density-ward-and-borough</a> |
| C2        | Office for National Statistics. 'Statistical bulletin Regional economic activity by gross domestic product, UK: 1998 to 2018'                                                                                                                                                                                    |
| C3        | Office for National Statistics. 'Statistical bulletin Regional economic activity by gross domestic product, UK: 1998 to 2018'                                                                                                                                                                                    |
| C4        | Office for National Statistics. 'Statistical bulletin Regional economic activity by gross domestic product, UK: 1998 to 2018'                                                                                                                                                                                    |

|    |                                                                                                                                                                 |
|----|-----------------------------------------------------------------------------------------------------------------------------------------------------------------|
| D1 | WWT. 2019. 'PR19 Challenge Report #5 Water consumption'                                                                                                         |
| D2 | The UK water partnership. 2015. 'Subreport-Agriculture's impacts on water availability'                                                                         |
| D3 | Thames Water. 'Final Water Resources Management Plan 2015 - 2040 Main Report'                                                                                   |
| D4 | <a href="https://londonist.com/london/features/where-s-my-tap-water-from">https://londonist.com/london/features/where-s-my-tap-water-from</a>                   |
| D5 | CITY OF LONDON ENVIRONMENTAL & ENGINEERING SERVICES DEPARTMENT WASTEWATER TREATMENT OPERATIONS. 2019. 'GREENWAY WASTEWATER TREATMENT CENTRE 2018 ANNUAL REPORT' |
| D6 | Thames Water. 'Non-Potable Water Reuse as a Demand Management Option for WRMP19 Options Appraisal Report'                                                       |

| Indicator | Hamburg, Germany                                                                                                                                                                                                                                                                                                      |
|-----------|-----------------------------------------------------------------------------------------------------------------------------------------------------------------------------------------------------------------------------------------------------------------------------------------------------------------------|
| A1        | Weather Atlas. 'Hamburg, Germany-Detailed Climate Information And Monthly Weather Forecast'                                                                                                                                                                                                                           |
| A2        | Weather Atlas. 'Hamburg, Germany-Detailed Climate Information And Monthly Weather Forecast'                                                                                                                                                                                                                           |
| A3        | <a href="https://en.wikipedia.org/wiki/List_of_parks_and_gardens_in_Hamburg">https://en.wikipedia.org/wiki/List_of_parks_and_gardens_in_Hamburg</a><br><a href="https://en.wikipedia.org/wiki/List_of_museums_in_Hamburg">https://en.wikipedia.org/wiki/List_of_museums_in_Hamburg</a>                                |
| A4        | The German Association of Cities. 'Profile of the German Water Sector 2015'                                                                                                                                                                                                                                           |
| B1        | Federal Minister of Food and Agriculture. 2015. 'The Forests in Germany-Selected Results of the Third National Forest Inventory'                                                                                                                                                                                      |
| B2        | Federal Minister of Food and Agriculture. 2015. 'The Forests in Germany-Selected Results of the Third National Forest Inventory'                                                                                                                                                                                      |
| B3        | Hamburgh.com. 'Trinkwasser Analysedaten Hamburg'<br><a href="https://www.hamburg.com/residents/housing/12792124/water-quality/">https://www.hamburg.com/residents/housing/12792124/water-quality/</a>                                                                                                                 |
| B4        | Hamburg Water Department. '2018 Annual Drinking Water Quality Report'                                                                                                                                                                                                                                                 |
| C1        | Staff (2016), Hamburger Melderegister (PDF) (in German),<br>Statistical office Hamburg and Schleswig-Holstein (Statistisches Amt für Hamburg und Schleswig-Holstein)                                                                                                                                                  |
| C2        | CEICDATA. 'Germany GDP per Capita: Hamburg 1991 - 2019   Yearly   EUR   Federal Statistics Office Germany'<br><a href="https://www.ceicdata.com/en/germany/esa-2010-gdp-per-capita-by-region/gdp-per-capita-hamburg">https://www.ceicdata.com/en/germany/esa-2010-gdp-per-capita-by-region/gdp-per-capita-hamburg</a> |
| C3        | CEICDATA. 'Germany GDP per Capita: Hamburg 1991 - 2019   Yearly   EUR   Federal Statistics Office Germany'<br><a href="https://www.ceicdata.com/en/germany/esa-2010-gdp-per-capita-by-region/gdp-per-capita-hamburg">https://www.ceicdata.com/en/germany/esa-2010-gdp-per-capita-by-region/gdp-per-capita-hamburg</a> |

|    |                                                                                                                                                                                                                                                                                                                                                                                                                                                                                |
|----|--------------------------------------------------------------------------------------------------------------------------------------------------------------------------------------------------------------------------------------------------------------------------------------------------------------------------------------------------------------------------------------------------------------------------------------------------------------------------------|
| C4 | CEICDATA. 'Germany GDP per Capita: Hamburg 1991 - 2019   Yearly   EUR   Federal Statistics Office Germany'<br><a href="https://www.ceicdata.com/en/germany/esa-2010-gdp-per-capita-by-region/gdp-per-capita-hamburg">https://www.ceicdata.com/en/germany/esa-2010-gdp-per-capita-by-region/gdp-per-capita-hamburg</a>                                                                                                                                                          |
| D1 | VERSORGUNGSSICHERHEIT FÜR HAMBURG (Hamburg Wasser). 'GESCHÄFTSBERICHT 2019 VERSORGUNGSSICHERHEIT FÜR HAMBURG JAHRESABSCHLÜSSE DER GESELLSCHAFTEN'<br><a href="https://www.hamburgwasser.de/fileadmin/hhw-privatkunden/unternehmen/Geschaeftsberichte/Geschaeftsbericht_2019/hamburgwasser-geschaeftsbericht2019.pdf">https://www.hamburgwasser.de/fileadmin/hhw-privatkunden/unternehmen/Geschaeftsberichte/Geschaeftsbericht_2019/hamburgwasser-geschaeftsbericht2019.pdf</a> |
| D2 | The German Association of Cities. 'Profile of the German Water Sector 2015'                                                                                                                                                                                                                                                                                                                                                                                                    |
| D3 | The German Association of Cities. 'Profile of the German Water Sector 2015'                                                                                                                                                                                                                                                                                                                                                                                                    |
| D4 | <a href="https://tappwater.co/us/can-i-drink-the-tap-water-in-hamburg/">https://tappwater.co/us/can-i-drink-the-tap-water-in-hamburg/</a>                                                                                                                                                                                                                                                                                                                                      |
| D5 | VERSORGUNGSSICHERHEIT FÜR HAMBURG (Hamburg Wasser). 'GESCHÄFTSBERICHT 2019 VERSORGUNGSSICHERHEIT FÜR HAMBURG JAHRESABSCHLÜSSE DER GESELLSCHAFTEN'<br><a href="https://www.hamburgwasser.de/fileadmin/hhw-privatkunden/unternehmen/Geschaeftsberichte/Geschaeftsbericht_2019/hamburgwasser-geschaeftsbericht2019.pdf">https://www.hamburgwasser.de/fileadmin/hhw-privatkunden/unternehmen/Geschaeftsberichte/Geschaeftsbericht_2019/hamburgwasser-geschaeftsbericht2019.pdf</a> |
| D6 | VERSORGUNGSSICHERHEIT FÜR HAMBURG (Hamburg Wasser). 'GESCHÄFTSBERICHT 2019 VERSORGUNGSSICHERHEIT FÜR HAMBURG JAHRESABSCHLÜSSE DER GESELLSCHAFTEN'<br><a href="https://www.hamburgwasser.de/fileadmin/hhw-privatkunden/unternehmen/Geschaeftsberichte/Geschaeftsbericht_2019/hamburgwasser-geschaeftsbericht2019.pdf">https://www.hamburgwasser.de/fileadmin/hhw-privatkunden/unternehmen/Geschaeftsberichte/Geschaeftsbericht_2019/hamburgwasser-geschaeftsbericht2019.pdf</a> |

| Indicator | Melbourne, Australia                                                                                                                                                                                                                                                                                                                                                                                                                                                                                                                                                         |
|-----------|------------------------------------------------------------------------------------------------------------------------------------------------------------------------------------------------------------------------------------------------------------------------------------------------------------------------------------------------------------------------------------------------------------------------------------------------------------------------------------------------------------------------------------------------------------------------------|
| A1        | Australian Government Bureau of Meteorology. Climate statistics for Australian locations Available at: <a href="http://www.bom.gov.au/jsp/ncc/cdio/cvg/av?p_stn_num=086071&amp;p_prim_element_index=0&amp;p_comp_element_index=0&amp;redraw=null&amp;p_display_type=statistics_summary&amp;normals_years=1991-2020&amp;tablesizebutt=normal">http://www.bom.gov.au/jsp/ncc/cdio/cvg/av?p_stn_num=086071&amp;p_prim_element_index=0&amp;p_comp_element_index=0&amp;redraw=null&amp;p_display_type=statistics_summary&amp;normals_years=1991-2020&amp;tablesizebutt=normal</a> |
| A2        | Australian Government Bureau of Meteorology. Climate statistics for Australian locations Available at: <a href="http://www.bom.gov.au/jsp/ncc/cdio/cvg/av?p_stn_num=086071&amp;p_prim_element_index=0&amp;p_comp_element_index=0&amp;redraw=null&amp;p_display_type=statistics_summary&amp;normals_years=1991-2020&amp;tablesizebutt=normal">http://www.bom.gov.au/jsp/ncc/cdio/cvg/av?p_stn_num=086071&amp;p_prim_element_index=0&amp;p_comp_element_index=0&amp;redraw=null&amp;p_display_type=statistics_summary&amp;normals_years=1991-2020&amp;tablesizebutt=normal</a> |
| A3        | <a href="https://whatson.melbourne.vic.gov.au/Placestogo/ParksandGardens/Pages/ParksandGardens.aspx?start=20">https://whatson.melbourne.vic.gov.au/Placestogo/ParksandGardens/Pages/ParksandGardens.aspx?start=20</a><br><a href="https://whatson.melbourne.vic.gov.au/placestogo/museumsandlibraries/museums/pages/museums.aspx">https://whatson.melbourne.vic.gov.au/placestogo/museumsandlibraries/museums/pages/museums.aspx</a>                                                                                                                                         |
| A4        | Melbourne Water. 'Melbourne Water Annual Report 2018/19'                                                                                                                                                                                                                                                                                                                                                                                                                                                                                                                     |
| B1        | Melbourne Water. 'Melbourne Water Annual Report 2018/19'                                                                                                                                                                                                                                                                                                                                                                                                                                                                                                                     |
| B2        | Environment Defenders Office (Victoria) Ltd. 2012. 'Protecting Victorian Wetlands'                                                                                                                                                                                                                                                                                                                                                                                                                                                                                           |
| B3        | Melbourne Water. 'Melbourne Water Annual Report 2018/19'                                                                                                                                                                                                                                                                                                                                                                                                                                                                                                                     |

|    |                                                                                                                                                                                                                                                                                                                                                       |
|----|-------------------------------------------------------------------------------------------------------------------------------------------------------------------------------------------------------------------------------------------------------------------------------------------------------------------------------------------------------|
| B4 | Victoria State Government Health and Human Service.<br>'Annual report on drinking water quality in Victoria 2017–18 Delivering quality drinking water to Victorians'                                                                                                                                                                                  |
| C1 | Idcommunity demographic resources. 'Greater Melbourne population density'<br><a href="https://profile.id.com.au/s_greater-melbourne/population-density">https://profile.id.com.au/s_greater-melbourne/population-density</a><br><a href="https://profile.id.com.au/australia/about?WebID=260">https://profile.id.com.au/australia/about?WebID=260</a> |
| C2 | SGS Economics & Planning. 2019. 'Economic performance of Australia's cities and regions'                                                                                                                                                                                                                                                              |
| C3 | SGS Economics & Planning. 2019. 'Economic performance of Australia's cities and regions'                                                                                                                                                                                                                                                              |
| C4 | SGS Economics & Planning. 2019. 'Economic performance of Australia's cities and regions'                                                                                                                                                                                                                                                              |
| D1 | Melbourne Water. 'Melbourne Water Outlook 2019'                                                                                                                                                                                                                                                                                                       |
| D2 | Melbourne Water. 'Melbourne Water Annual Report 2018/19'                                                                                                                                                                                                                                                                                              |
| D3 | Melbourne Water. 'Melbourne Water Annual Report 2018/19'                                                                                                                                                                                                                                                                                              |
| D4 | <a href="https://www.melbournewater.com.au/water/water-facts-and-history/why-melbournes-water-tastes-great-tap">https://www.melbournewater.com.au/water/water-facts-and-history/why-melbournes-water-tastes-great-tap</a>                                                                                                                             |
| D5 | Melbourne Water. 'Melbourne Water Outlook 2019'                                                                                                                                                                                                                                                                                                       |
| D6 | Melbourne Water. 'Melbourne Water Outlook 2019'                                                                                                                                                                                                                                                                                                       |

| Indicator | Sydney, Australia                                                                                                                                                                                                                                                                                                                                                                                                                                                                                                                                                            |
|-----------|------------------------------------------------------------------------------------------------------------------------------------------------------------------------------------------------------------------------------------------------------------------------------------------------------------------------------------------------------------------------------------------------------------------------------------------------------------------------------------------------------------------------------------------------------------------------------|
| A1        | Australian Government Bureau of Meteorology. Climate statistics for Australian locations Available at: <a href="http://www.bom.gov.au/jsp/ncc/cdio/cvg/av?p_stn_num=066062&amp;p_prim_element_index=0&amp;p_comp_element_index=0&amp;redraw=null&amp;p_display_type=statistics_summary&amp;normals_years=1991-2020&amp;tablesizebutt=normal">http://www.bom.gov.au/jsp/ncc/cdio/cvg/av?p_stn_num=066062&amp;p_prim_element_index=0&amp;p_comp_element_index=0&amp;redraw=null&amp;p_display_type=statistics_summary&amp;normals_years=1991-2020&amp;tablesizebutt=normal</a> |
| A2        | Australian Government Bureau of Meteorology. Climate statistics for Australian locations Available at: <a href="http://www.bom.gov.au/jsp/ncc/cdio/cvg/av?p_stn_num=066062&amp;p_prim_element_index=0&amp;p_comp_element_index=0&amp;redraw=null&amp;p_display_type=statistics_summary&amp;normals_years=1991-2020&amp;tablesizebutt=normal">http://www.bom.gov.au/jsp/ncc/cdio/cvg/av?p_stn_num=066062&amp;p_prim_element_index=0&amp;p_comp_element_index=0&amp;redraw=null&amp;p_display_type=statistics_summary&amp;normals_years=1991-2020&amp;tablesizebutt=normal</a> |
| A3        | <a href="https://www.cityofsydney.nsw.gov.au/explore/facilities/parks/local-parks">https://www.cityofsydney.nsw.gov.au/explore/facilities/parks/local-parks</a>                                                                                                                                                                                                                                                                                                                                                                                                              |
| A4        | <a href="https://www.waternsw.com.au/supply/Greater-Sydney/greater-sydneys-dam-levels">https://www.waternsw.com.au/supply/Greater-Sydney/greater-sydneys-dam-levels</a>                                                                                                                                                                                                                                                                                                                                                                                                      |
| B1        | <a href="https://www.cityofsydney.nsw.gov.au/live/trees/urban-forest">https://www.cityofsydney.nsw.gov.au/live/trees/urban-forest</a>                                                                                                                                                                                                                                                                                                                                                                                                                                        |
| B2        | R.T. Kingsford, K. Brandis, R. Thomas, P. Crighton, E. Knowles and E. Gale. 2003. 'The Distribution of Wetlands in New South Wales'                                                                                                                                                                                                                                                                                                                                                                                                                                          |
| B3        | Sydney Water. 'Quarterly Drinking Water Quality Report Macarthur Delivery System 1 October 2018 to 31 December 2018'                                                                                                                                                                                                                                                                                                                                                                                                                                                         |
| B4        | Sydney Water. 'Quarterly Drinking Water Quality Report Macarthur Delivery System 1 October 2018 to 31 December 2018'                                                                                                                                                                                                                                                                                                                                                                                                                                                         |
| C1        | <a href="https://www.cityofsydney.nsw.gov.au/learn/research-and-statistics/the-city-at-a-glance/greater-sydney">https://www.cityofsydney.nsw.gov.au/learn/research-and-statistics/the-city-at-a-glance/greater-sydney</a>                                                                                                                                                                                                                                                                                                                                                    |

|    |                                                                                                                                                                                     |
|----|-------------------------------------------------------------------------------------------------------------------------------------------------------------------------------------|
| C2 | SGS Economics & Planning. 2019. 'Economic performance of Australia's cities and regions'                                                                                            |
| C3 | SGS Economics & Planning. 2019. 'Economic performance of Australia's cities and regions'                                                                                            |
| C4 | SGS Economics & Planning. 2019. 'Economic performance of Australia's cities and regions'                                                                                            |
| D1 | Sydney Water. 'Sydney Water Annual Report 2018/19'                                                                                                                                  |
| D2 | Sydney Water. 'Sydney Water Annual Report 2018/19'                                                                                                                                  |
| D3 | Sydney Water. 'Sydney Water Annual Report 2018/19'                                                                                                                                  |
| D4 | <a href="https://www.sydneywater.com.au/SW/education/drinking-water/Water-sources/index.htm">https://www.sydneywater.com.au/SW/education/drinking-water/Water-sources/index.htm</a> |
| D5 | Sydney Water. 'Sydney Water Annual Report 2018/19'                                                                                                                                  |
| D6 | Sydney Water. 'Sydney Water Annual Report 2018/19'                                                                                                                                  |

| Indicator | Curitiba, Brazil                                                                                                                                                                                                                                                     |
|-----------|----------------------------------------------------------------------------------------------------------------------------------------------------------------------------------------------------------------------------------------------------------------------|
| A1        | Weather Atlas. 'Curitiba, Brazil-Detailed Climate Information And Monthly Weather Forecast'                                                                                                                                                                          |
| A2        | Weather Atlas. 'Curitiba, Brazil-Detailed Climate Information And Monthly Weather Forecast'                                                                                                                                                                          |
| A3        | <a href="https://www.pbs.org/frontlineworld/fellows/brazil1203/parks.html">https://www.pbs.org/frontlineworld/fellows/brazil1203/parks.html</a>                                                                                                                      |
| A4        | SANEPAR. 'RELATÓRIO ANUAL DA QUALIDADE DA ÁGUA 2015 SISTEMA DE ABASTECIMENTO DE CURITIBA' Available at:<br><a href="http://www.sanepar.com.br/sanepar/RelatorioQualidadeAgua/2015/001.pdf">http://www.sanepar.com.br/sanepar/RelatorioQualidadeAgua/2015/001.pdf</a> |
| B1        | The Natural conservancy. 'URBAN WATER BLUEPRINT of Curitiba' Available at:<br><a href="http://water.nature.org/waterblueprint/city/curitiba/#/c=10:-25.52328:-49.32778">http://water.nature.org/waterblueprint/city/curitiba/#/c=10:-25.52328:-49.32778</a>          |
| B2        | The Natural conservancy. 'URBAN WATER BLUEPRINT of Curitiba' Available at:<br><a href="http://water.nature.org/waterblueprint/city/curitiba/#/c=10:-25.52328:-49.32778">http://water.nature.org/waterblueprint/city/curitiba/#/c=10:-25.52328:-49.32778</a>          |
| B3        | <a href="https://www.rcenetwork.org/portal/rce-curitiba-parana-2019-1">https://www.rcenetwork.org/portal/rce-curitiba-parana-2019-1</a>                                                                                                                              |
| B4        | <a href="https://www.ana.gov.br/noticias-antigas/situaassapso-dos-rios-de-curitiba-esta-entre-ruim.2019-03-15.6895607577">https://www.ana.gov.br/noticias-antigas/situaassapso-dos-rios-de-curitiba-esta-entre-ruim.2019-03-15.6895607577</a>                        |
| C1        | <a href="https://www.citypopulation.de/en/brazil/parana/curitiba/410690205__curitiba/">https://www.citypopulation.de/en/brazil/parana/curitiba/410690205__curitiba/</a>                                                                                              |
| C2        | <a href="https://www.rcenetwork.org/portal/rce-curitiba-parana-2019-1">https://www.rcenetwork.org/portal/rce-curitiba-parana-2019-1</a>                                                                                                                              |
| C3        | <a href="http://icities4greengrowth.in/city/curitiba-brazil">http://icities4greengrowth.in/city/curitiba-brazil</a>                                                                                                                                                  |
| C4        | <a href="http://icities4greengrowth.in/city/curitiba-brazil">http://icities4greengrowth.in/city/curitiba-brazil</a>                                                                                                                                                  |
| D1        | PREFEITURA MUNICIPAL DE CURITIBA PANORAMA DO SANEAMENTO BÁSICO EM CURITIBA. 2017. Available at:<br>'PLANO MUNICIPAL DE ABASTECIMENTO DE ÁGUA'<br><a href="https://mid.curitiba.pr.gov.br/2017/00213385.pdf">https://mid.curitiba.pr.gov.br/2017/00213385.pdf</a>     |

|    |                                                                                                                                                                                                                                                                     |
|----|---------------------------------------------------------------------------------------------------------------------------------------------------------------------------------------------------------------------------------------------------------------------|
| D2 | PREFEITURA MUNICIPAL DE CURITIBA PANORAMA DO SANEAMENTO BÁSICO EM CURITIBA.<br>2017. Available at:<br>'PLANO MUNICIPAL DE ABASTECIMENTO DE ÁGUA'<br><a href="https://mid.curitiba.pr.gov.br/2017/00213385.pdf">https://mid.curitiba.pr.gov.br/2017/00213385.pdf</a> |
| D3 | PREFEITURA MUNICIPAL DE CURITIBA PANORAMA DO SANEAMENTO BÁSICO EM CURITIBA.<br>2017. Available at:<br>'PLANO MUNICIPAL DE ABASTECIMENTO DE ÁGUA'<br><a href="https://mid.curitiba.pr.gov.br/2017/00213385.pdf">https://mid.curitiba.pr.gov.br/2017/00213385.pdf</a> |
| D4 | The Natural conservancy. 'URBAN WATER BLUEPRINT of Curitiba' Available at:<br><a href="http://water.nature.org/waterblueprint/city/curitiba/#/c=10:-25.52328:-49.32778">http://water.nature.org/waterblueprint/city/curitiba/#/c=10:-25.52328:-49.32778</a>         |
| D5 | <a href="https://www.rcenetwork.org/portal/rce-curitiba-parana-2019-1">https://www.rcenetwork.org/portal/rce-curitiba-parana-2019-1</a>                                                                                                                             |
| D6 | PREFEITURA MUNICIPAL DE CURITIBA PANORAMA DO SANEAMENTO BÁSICO EM CURITIBA.<br>2017. Available at:<br>'PLANO MUNICIPAL DE ABASTECIMENTO DE ÁGUA'<br><a href="https://mid.curitiba.pr.gov.br/2017/00213385.pdf">https://mid.curitiba.pr.gov.br/2017/00213385.pdf</a> |

### S3. Relevant documents considered for documentary analysis for the selected three cities

|       | Document title                                                                                                        | Date published | Number of Pages |
|-------|-----------------------------------------------------------------------------------------------------------------------|----------------|-----------------|
| Wuhan | Wuhan Urban Drainage Regulations                                                                                      | 2002.12.1      | 9               |
| Wuhan | Wuhan Water Function Division                                                                                         | 2004.12.20     | 2               |
| Wuhan | Wuhan Water Conservation Regulations                                                                                  | 2005.1.31      | 3               |
| Wuhan | Wuhan Groundwater Management Measures                                                                                 | 2006.1.14      | 4               |
| Wuhan | Regulations of Wuhan Municipality on the Construction of Supporting Water Saving Facilities for Construction Projects | 2007.12.7      | 2               |
| Wuhan | Wuhan Water Resources Comprehensive Plan (2010-2030)                                                                  | 2012.10.1      | 375             |
| Wuhan | Wuhan Water Supply and consumption Regulations                                                                        | 2012.3.29      | 3               |
| Wuhan | Wuhan Water Resources Protection Regulations                                                                          | 2013.4.10      | 10              |
| Wuhan | Wuhan City Drainage Construction Management Measures                                                                  | 2014.11.10     | 4               |
| Wuhan | Wuhan Water Ecological Civilisation City Construction Pilot Implementation Plan (2015 ~ 2017)                         | 2015.1.31      | 161             |
| Wuhan | The 13th Five-Year Plan for Water Development in Wuhan City, Hubei Province (2016-2020)                               | 2015.10.1      | 144             |
| Wuhan | Administrative Measures for Secondary Water Supply Facilities of Urban Residents in Wuhan                             | 2015.2.6       | 3               |
| Wuhan | Wuhan City Sponge City Planning and Design Guidelines                                                                 | 2015.8.21      | 68              |
| Wuhan | Wuhan City Sponge City Construction Pilot Implementation Plan                                                         | 2016.3.21      | 10              |
| Wuhan | Wuhan City Water Pollution Prevention Action Plan (2016-2020)                                                         | 2016.6.30      | 19              |
| Wuhan | Wuhan Flood Control Management Regulations                                                                            | 2018.3.30      | 3               |
| Wuhan | Wuhan Lake Protection Regulations                                                                                     | 2018.5.11      | 11              |

|           |                                                                                                  |            |     |
|-----------|--------------------------------------------------------------------------------------------------|------------|-----|
| Wuhan     | Special plan for urban sewage collection and treatment in Wuhan (2018-2035)                      | 2019.12.24 | 7   |
| Cleveland | NOACA: Clean water 2000                                                                          | 2003.12    | 18  |
| Cleveland | Lower Euclid Creek Green Greenway Plan                                                           | 2006.6     | 79  |
| Cleveland | Euclid Creek Watershed Action Plan                                                               | 2006.6     | 212 |
| Cleveland | City of Cleveland Floodplain Ordinance                                                           | 2011.8     | 22  |
| Cleveland | Big creek watershed plan                                                                         | 2013.12    | 308 |
| Cleveland | Cleveland Lakefront Reservation Master Plan                                                      | 2015.3     | 6   |
| Cleveland | CLEVELAND DIVISION OF WATER DESIGN AND CONSTRUCTION MANUAL                                       | 2017.2.6   | 249 |
| Cleveland | NOACA: Water Quality Strategic Plan                                                              | 2017.12    | 51  |
| Cleveland | Gold Cleveland Water Application                                                                 | 2018.12    | 16  |
| Cleveland | NORTHEAST OHIO (NOACA): Clean water 2020 (Draft)                                                 | 2020.6     | 268 |
| Cleveland | Connecting Cleveland: The Waterfront District Plan                                               | 2004.12.17 | 4   |
| Cleveland | REIMAGINING A MORE SUSTAINABLE CLEVELAND                                                         | 2008.12.19 | 40  |
| Cleveland | SUSTAINABLE CLEVELAND MUNICIPAL ACTION PLAN                                                      | 2013.10.1  | 78  |
| Cleveland | Riparian Setback Ordinance                                                                       | 2015.5.7   | 22  |
| Cleveland | Cleveland Climate Action Plan 2018 UPDATE                                                        | 2018.9.19  | 82  |
| Cleveland | AN EQUITABLE WATER FUTURE Cleveland                                                              | 2020.2.25  | 20  |
| Sydney    | Sydney Water Sewer mining policy                                                                 | 2009.1     | 5   |
| Sydney    | DEVELOPER HANDBOOK for WATER SENSITIVE URBAN DESIGN                                              | 2013.11    | 116 |
| Sydney    | Sydney Corporate Strategic Plan                                                                  | 2013.7     | 7   |
| Sydney    | Plan of Management Botany Wetlands 2018 - 2028                                                   | 2013.7     | 29  |
| Sydney    | Sydney Interim Floodplain Management Policy                                                      | 2014.5     | 17  |
| Sydney    | Sydney Pesticide use notification plan                                                           | 2014.6     | 8   |
| Sydney    | SYDNEY STORMWATER MANAGEMENT & WATER SENSITIVE URBAN DESIGN POLICY                               | 2016.10    | 21  |
| Sydney    | Opportunities for a Water Sensitive Greater Sydney: The importance of water in our city's future | 2016.2     | 18  |
| Sydney    | Sydney Enhancing the liveability of our cities                                                   | 2016.3     | 19  |
| Sydney    | Sydney Decentralised Water Master Plan 2012–2030                                                 | 2017.3     | 82  |
| Sydney    | SYDNEY'S WATER FUTURE PLANNING FOR AN UNRAINY DAY                                                | 2017.12    | 24  |
| Sydney    | 2017 Metropolitan Water Plan for Sydney                                                          | 2017.3     | 80  |
| Sydney    | SYDNEY WSUD Guideline – Transport Projects                                                       | 2017.5     | 42  |
| Sydney    | Sydney Environment Strategy 2018-2030                                                            | 2018.3     | 18  |
| Sydney    | Sydney Pollution Incident Response Management Plan                                               | 2018.6     | 9   |
| Sydney    | Sydney Water's Research & Innovation Strategy                                                    | 2018.7     | 34  |
| Sydney    | Sydney Environment Plan 2019–20                                                                  | 2019.04    | 16  |
| Sydney    | Sydney Water Regulation 2017                                                                     | 2017.8.25  | 14  |
| Sydney    | Sydney Water Recycled Water Management Policy                                                    | 2018.6.21  | 2   |
| Sydney    | Sydney Water Drinking Water Management Policy                                                    | 2018.6.21  | 2   |
| Sydney    | Sydney Drinking Water Management Manual                                                          | 2018.7.27  | 77  |

|        |                                        |          |   |
|--------|----------------------------------------|----------|---|
| Sydney | Sydney Water Environmental Policy      | 2019.2.3 | 2 |
| Sydney | Sydney Water Stormwater fencing policy | 2020.6.2 | 5 |

Note: Selected documents are shown as color-shaded documents

#### S4. Key word extraction results

| Destination layer               | First-level indicators     | Second-level indicators       | Key words | W1   | W2   | W3  | C1  | C2  | C3  | S1  | S2   | S3  |
|---------------------------------|----------------------------|-------------------------------|-----------|------|------|-----|-----|-----|-----|-----|------|-----|
| Urban Water policy construction | Water resources management | Water supply and utilisation  | X1        | 372  | 2345 | 54  | 79  | 174 | 18  | 217 | 110  | 501 |
|                                 |                            |                               | X2        | 19   | 29   | 0   | 6   | 0   | 38  | 0   | 2    | 51  |
|                                 |                            |                               | X3        | 3    | 33   | 9   | 9   | 52  | 12  | 29  | 16   | 14  |
|                                 |                            |                               | X4        | 65   | 886  | 0   | 66  | 10  | 4   | 27  | 28   | 16  |
|                                 |                            |                               | X5        | 86   | 492  | 5   | 14  | 8   | 12  | 50  | 68   | 40  |
|                                 |                            |                               | X6        | 185  | 1493 | 21  | 3   | 0   | 1   | 16  | 85   | 51  |
|                                 |                            | Water recycling               | X7        | 12   | 83   | 1   | 77  | 1   | 1   | 26  | 6    | 77  |
|                                 |                            |                               | X8        | 15   | 93   | 0   | 0   | 3   | 0   | 76  | 165  | 37  |
|                                 |                            |                               | X9        | 80   | 287  | 26  | 36  | 0   | 23  | 266 | 53   | 8   |
|                                 |                            |                               | X10       | 9    | 33   | 0   | 0   | 0   | 0   | 1   | 0    | 9   |
|                                 |                            |                               | X11       | 127  | 324  | 7   | 1   | 0   | 11  | 0   | 103  | 30  |
|                                 |                            | Water Resource Endowment      | X12       | 1    | 35   | 78  | 67  | 0   | 5   | 73  | 3    | 19  |
|                                 |                            |                               | X13       | 3    | 9    | 1   | 26  | 0   | 3   | 2   | 2    | 6   |
|                                 |                            |                               | X14       | 1892 | 4147 | 99  | 406 | 47  | 102 | 102 | 92   | 116 |
|                                 |                            |                               | X15       | 74   | 2375 | 193 | 84  | 15  | 13  | 65  | 23   | 11  |
|                                 | Water safety guarantee     | Water source safety           | X16       | 11   | 15   | 0   | 0   | 0   | 0   | 3   | 2    | 1   |
|                                 |                            |                               | X17       | 39   | 103  | 14  | 19  | 0   | 2   | 13  | 5    | 50  |
|                                 |                            |                               | X18       | 165  | 515  | 15  | 72  | 26  | 38  | 53  | 12   | 31  |
|                                 |                            |                               | X19       | 176  | 770  | 79  | 200 | 0   | 157 | 58  | 56   | 24  |
|                                 |                            |                               | X20       | 0    | 120  | 2   | 37  | 0   | 0   | 13  | 0    | 0   |
|                                 |                            |                               | X21       | 0    | 170  | 31  | 51  | 0   | 2   | 0   | 0    | 3   |
|                                 |                            |                               | X22       | 2    | 165  | 1   | 120 | 0   | 1   | 56  | 7    | 0   |
|                                 |                            | Flood Resilience and Drainage | X23       | 90   | 160  | 13  | 26  | 0   | 10  | 6   | 9    | 11  |
|                                 |                            |                               | X24       | 62   | 21   | 24  | 51  | 0   | 8   | 45  | 31   | 0   |
|                                 |                            |                               | X25       | 63   | 364  | 126 | 112 | 4   | 12  | 26  | 8    | 0   |
|                                 |                            |                               | X26       | 24   | 38   | 223 | 12  | 0   | 0   | 207 | 155  | 36  |
|                                 |                            |                               | X27       | 56   | 117  | 34  | 120 | 3   | 30  | 66  | 47   | 44  |
|                                 |                            | Water regulation guarantee    | X28       | 164  | 472  | 271 | 552 | 96  | 286 | 100 | 2138 | 441 |
|                                 |                            |                               | X29       | 217  | 107  | 26  | 6   | 0   | 18  | 16  | 49   | 68  |
|                                 |                            |                               | X30       | 149  | 588  | 248 | 31  | 52  | 18  | 8   | 2    | 6   |
|                                 |                            |                               | X31       | 33   | 91   | 2   | 82  | 1   | 6   | 10  | 4    | 31  |
|                                 | Water                      | Water ecological status       | X32       | 479  | 457  | 43  | 44  | 0   | 0   | 11  | 2    | 4   |
|                                 |                            |                               | X33       | 14   | 15   | 0   | 7   | 0   | 0   | 0   | 0    | 0   |
|                                 |                            |                               | X34       | 104  | 148  | 322 | 272 | 0   | 16  | 278 | 23   | 21  |
|                                 |                            |                               | X35       | 54   | 145  | 29  | 258 | 0   | 2   | 151 | 25   | 1   |



|                            |                                 |     |     |     |    |     |    |    |    |     |     |
|----------------------------|---------------------------------|-----|-----|-----|----|-----|----|----|----|-----|-----|
| ecological<br>health       |                                 | X36 | 4   | 2   | 9  | 0   | 0  | 0  | 1  | 0   | 0   |
|                            | Water ecological<br>restoration | X37 | 96  | 87  | 3  | 60  | 0  | 18 | 0  | 10  | 4   |
|                            |                                 | X38 | 498 | 431 | 99 | 17  | 93 | 50 | 80 | 122 | 103 |
|                            |                                 | X39 | 152 | 434 | 11 | 156 | 2  | 60 | 29 | 27  | 41  |
|                            |                                 | X40 | 0   | 17  | 1  | 0   | 0  | 1  | 0  | 4   | 74  |
| Water<br>culture<br>system | Cultural heritage               | X41 | 267 | 4   | 0  | 0   | 0  | 1  | 0  | 0   | 1   |
|                            |                                 | X42 | 202 | 150 | 62 | 20  | 0  | 7  | 58 | 122 | 26  |
|                            |                                 | X43 | 123 | 285 | 20 | 53  | 0  | 3  | 37 | 7   | 29  |
|                            | Public awareness                | X44 | 86  | 269 | 23 | 29  | 64 | 24 | 16 | 29  | 20  |
|                            |                                 | X45 | 15  | 20  | 0  | 5   | 0  | 9  | 0  | 6   | 8   |
|                            |                                 | X46 | 7   | 101 | 31 | 1   | 0  | 1  | 0  | 0   | 1   |
|                            |                                 | X47 | 29  | 17  | 0  | 4   | 0  | 3  | 9  | 9   | 3   |
